# ***specificity*: an R package for analysis of feature specificity to environmental and higher dimensional variables, applied to microbiome species data**

## **Running Title**

Generalized specificity analysis of microbiome data

## **Authors**

John L. Darcy<sup>1</sup>, Anthony S. Amend<sup>2,3</sup>, Sean O. I. Swift<sup>2</sup>, Pacifica S. Sommers<sup>4</sup>, Catherine A. Lozupone<sup>1</sup>

## **Affiliations**

<sup>1</sup> Division of Biomedical Informatics and Personalized Medicine, University of Colorado School of Medicine, Aurora, Colorado, USA.

<sup>2</sup> School of Life Sciences, University of Hawai'i at Mānoa, Honolulu, HI, USA.

<sup>3</sup> Pacific Biosciences Research Center, University of Hawai'i at Mānoa, Honolulu, HI, USA.

<sup>4</sup> Department of Ecology and Evolutionary Biology, University of Colorado, Boulder, CO, USA.

## **Corresponding Author**

J.L. Darcy; darcyj@colorado.edu.

## **Declarations**

### **Ethical Approval and Consent to participate**

N/A

### **Consent for publication**

All authors have given consent for this manuscript to be published.

### **Availability of data and materials**

R packages *specificity* and *specificity.shiny* can be downloaded from GitHub: <https://github.com/darcyj/specificity>, <https://github.com/darcyj/specificity.shiny>. In addition to software, our *specificity*'s GitHub repository contains thorough documentation, including guidance on installation, and a full tutorial vignette for using *specificity* with examples from an included data set. Code and data to replicate the analyses shown here can be found on GitHub as well: [https://github.com/darcyj/specificity\\_analyses](https://github.com/darcyj/specificity_analyses).

### **Competing interests**

The authors declare that no conflict of interest exists.

### **Funding**

Funding was provided by an NIH NLM Computational Biology training grant (5 T15 LM009451-12) an NSF award (1255972). Funding bodies had no role in study design, analysis, interpretation, or in the preparation of this manuscript.

### **Authors' contributions**

JD wrote the main manuscript, with contributions from AA, SS, PS, and CL. Data analysis, figure preparation, and software development were done by JD. All authors reviewed the manuscript.

## 40 Acknowledgements

41 The authors thank J. Siebert and C. Martin for many helpful discussions and data wrangling.

## 42 Authors' information

43 N/A

## 44 Abstract

### 45 Background

46 Understanding the factors that influence microbes' environmental distributions is important for deter-  
47 mining drivers of microbial community composition. These include environmental variables like temperature  
48 and pH, and higher-dimensional variables like geographic distance and host species phylogeny. In microbial  
49 ecology, "specificity" is often described in the context of symbiotic or host parasitic interactions, but speci-  
50 ficity can be more broadly used to describe the extent to which a species occupies a narrower range of an  
51 environmental variable than expected by chance. Using a standardization we describe here, Rao's (1982,  
52 2010) Quadratic Entropy can be conveniently applied to calculate specificity of a feature, such as a species,  
53 to many different environmental variables.

### 54 Results

55 We present our R package *specificity* for performing the above analyses, and apply it to four real-life  
56 microbial data sets to demonstrate its application. We found that many fungi within the leaves of native  
57 Hawaiian plants had strong specificity to rainfall and elevation, even though these variables showed minimal  
58 importance in a previous analysis of fungal beta-diversity. In Antarctic cryoconite holes, our tool revealed  
59 that many bacteria have specificity to co-occurring algal community composition. Similarly, in the human  
60 gut microbiome, many bacteria showed specificity to the composition of bile acids. Finally, our analysis of the  
61 Earth Microbiome Project data set showed that most bacteria show strong ontological specificity to sample  
62 type. Our software performed as expected on synthetic data as well.

### 63 Conclusions

64 *specificity* is well-suited to analysis of microbiome data, both in synthetic test cases, and across multiple  
65 environment types and experimental designs. The analysis and software we present here can reveal patterns  
66 in microbial taxa that may not be evident from a community-level perspective. These insights can also be  
67 visualized and interactively shared among researchers using *specificity*'s companion package, *specificity.shiny*.

## 68 Introduction

69 The word "specificity" has uses across multiple disciplines. In ecology, and especially for microbes, "speci-  
70 ficity" is often used in the context of symbiotic interactions; for example the specificity of a parasitic species  
71 may be the degree to which it associates with a narrow consortia of host species [1; 2; 3]. In pharmacology  
72 and biochemistry, specificity can describe the "narrowness of the range of substances with which an antibody  
73 or other agent acts" [4]. Synthesizing these definitions, we arrive at a general concept of specificity, where a  
74 feature (*e.g.* a species) is specific to some variable (*e.g.* elevation) when it occupies or is otherwise associated  
75 with a limited breadth of that variable.

76 This definition is consistent across multiple variable types. For example, a species that is found only  
77 across a narrow band of elevation, perhaps between 200 and 500 meters above sea level would have stronger  
78 specificity to elevation than a species that is found between sea level and 1000 meters. This is similar to a  
79 parasite that is found only within a narrow clade of hosts; it has stronger host specificity than a parasite that  
80 is found across a much wider phylogenetic range [2]. This concept can be expanded even farther, to diversity  
81 of some co-occurring feature class. For example, metabolites that co-occur with bacteria in the human gut

82 microbiome (microbes within the human gut). Under our definition, a microbe may have specificity to a  
83 narrow range of metabolomic compositions. Furthermore, specificity as we describe it here, is not the same  
84 as bipartite network specialization like  $H2'$ ,  $d'$ , and  $NODF$  metrics [5; 6]. Those metrics apply to strictly  
85 categorical contingency data, for example a matrix of observation counts where columns are pollinator species  
86 and rows are plant species. Instead, our generalized specificity approach is best suited to continuous data.

87 Our generalized specificity analysis has several benefits over modeling a microbe’s relative abundance using  
88 a variable of interest, since specificity analysis has no underlying model. First, high-throughput sequencing  
89 (HTS) microbiome data notoriously contain many zeroes, corresponding to the lack of an observation of  
90 species in a samples. Disregarding the difficulties in modeling such data, which certainly can be overcome [7],  
91 these data are perfect for the “specificity approach”. This is because the alternative hypothesis of a specificity  
92 analysis (the focal species encounters less environmental heterogeneity than expected by chance) includes  
93 cases where the focal species only occupies a limited range of the variable of interest, being absent (zero)  
94 everywhere else. A further consideration in modeling approaches is non-monotonic relationships between  
95 species and environmental variables. For example, a species may have specificity to intermediate elevations,  
96 so its density function of elevation would be non-monotonic, or even multimodal; and that’s just one species.  
97 Within a HTS microbiome dataset, species may be expected to run the gamut of distribution shapes and  
98 modalities. Variables of interest also present their own challenges to modeling, since variables may be vectors  
99 (*e.g.* elevation, pH), distance or dissimilarity matrices (*e.g.* geographic distance, beta-diversity), phylogenies,  
100 or even sample-type ontologies. The generalized specificity approach we present here can accommodate all of  
101 the aforementioned variable types, unlike other approaches where the statistics used to understand microbe-  
102 environment relationships are restricted by variable type. Furthermore, our approach does not produce a  
103 model, or answer the question “across what range of the variable does the species occur”. Instead, we quantify  
104 the extent to which the species occupies a limited breadth of that variable without the need for such a model.

105 Meaningfully applying this general idea of specificity to multiple data types is challenging because of  
106 the different specificity metrics available to different kinds of data. With host phylogenetic data, specificity  
107 may be calculated as phylodiversity [8], or host phylogenetic entropy [9], or host richness [10]. However,  
108 with other data types these metrics are not useful – one cannot calculate phylogenetic entropy of elevation,  
109 for example. Per our definition above, specificity must be a measure of the breadth (*i.e.* heterogeneity,  
110 diversity) of an environmental variable occupied by the focal species. With a variable like elevation, a naive  
111 specificity metric may be as simple as the variance in elevation where the focal species is present, or weighted  
112 variance for a more intuitive approach. However, such a metric would not be applicable to phylogenetic data  
113 sets because it is limited to 1-dimensional data types (*i.e.* column vectors). Furthermore, we wanted our  
114 general idea of specificity to be useful for dissimilarity matrices. We found that Rao’s Quadratic Entropy  
115 [11; 12; 13] is a convenient diversity metric that can be applied to all abovementioned data, with a modicum  
116 of standardization (detailed in our Methods section).

117 Here, we present a software package written in R and C++ that implements a generalized specificity  
118 analysis. Our package, *specificity*, calculates specificity values for each species in a sample-by-species ma-  
119 trix. In microbiology, this data structure often appears as a table of OTUs (operational taxonomic units;  
120 a substitute for species) or ASVs (Amplicon Sequence Variants; OTUs represented by unique sequences af-  
121 ter applying a denoiser such as DADA2 [14]). We simulated species distributions with varying strengths of  
122 specificity, and used those simulated data to validate our implementation. Our simulations were also used  
123 to ensure that specificity is not sensitive to occupancy (*i.e.* in how many samples a species appears), which  
124 is a significant improvement compared to the standardized effect size (SES) method [2; 15], and methods  
125 that use un-weighted (presence-absence) species data [10]. Our simulations also confirmed that the speci-  
126 ficity we calculate here is scale-invariant with regard to environmental / phylogenetic data, and also to focal  
127 species abundance data. To illustrate how specificity can be used, we applied our software to four previously-  
128 published microbiological data sets, each from different environments: fungi living within the leaves of native  
129 Hawaiian plants, human gut microbiome bacteria, bacteria living within Antarctic glaciers, and the global  
130 Earth Microbiome Project data set.

131

## 132 Methods

### 133 RQE

134 We calculate specificity using Rao’s metric [11; 12]. It is sometimes abbreviated FDQ for quadratic  
135 functional diversity, but since we use the same mathematics in a non-functional context, here we simply refer  
136 to the metric as *RQE* (Rao’s Quadratic Entropy), similar to the use of “QE” by its inventor. *RQE* is the  
137 sum of the elementwise product of two square matrices (excluding the diagonal). In our use, the first matrix  
138 (*D*) is a dissimilarity matrix containing differences between samples (Figure 1). For example, in the context  
139 of phylogenetic specificity these differences are phylogenetic distances (*i.e.* cophenetic distances) between  
140 hosts. Samples from the same host species have 0 distance. The second matrix (*W*) contains all pairwise  
141 products of weights for the focal species. Given a column vector of species weights *p* from a site-by-species  
142 matrix (“OTU table”), *W<sub>ij</sub>* contains the product of the abundances (weights) of the focal species at sample *i*  
143 and sample *j*: *p<sub>i</sub>p<sub>j</sub>*. Via *D ∘ W* (or *D<sub>ij</sub>p<sub>i</sub>p<sub>j</sub>* for a single pairwise product; Equation 1), we weight matrix *D* to  
144 up-weight distances between samples where the focal species occurred, and down-weight distances between  
145 samples where the focal species was absent in either. We use the term “weights” to describe *p* because the  
146 values within could be relative abundances or any other metric that describes the importance of a species  
147 within a sample. Conversely, we have chosen to focus this manuscript on “species”, but note that *p* could be  
148 a vector of weights for any feature (a type of rock, a metabolite, etc).

$$RQE = \sum_{i \neq j} D_{ij} p_i p_j \quad (1)$$

149 With *RQE*, a focal species with strong specificity has relatively high weights for low differences. This  
150 metric was originally developed for phylogenetic distances, but here we apply it to many different *D* matrices,  
151 including euclidean transformations of 1-dimensional data (e.g. pairwise elevational difference), or more  
152 complex 2-dimensional data like Bray-Curtis dissimilarity between host metabolomic profiles.

153 As such, a species with “perfect” specificity will always have *RQE* = 0. For example, consider a focal  
154 species *S* that can be found in habitats A, B, C, or D, with multiple samples collected for each category (Figure  
155 1). If *S* is only found in samples from habitat A, matrices *D* and *W* will contain zeroes in opposite positions,  
156 resulting in *RQE* = 0. Note that weights near zero can also act similarly to zero since this is a weighted  
157 metric. In this way, a focal species can occupy every single sample (all values of *p* are nonzero positive) and  
158 still have *RQE* near zero. This is important so that spurious species detections do not significantly contribute  
159 to specificity. For example, in a DNA sequencing experiment, small amounts of contamination may occur  
160 during DNA extraction or library preparation. The magnitude of that contamination is expected to be small  
161 compared to the signal in an actual sample, but may result in spurious species detections. However, because  
162 these contaminants would be expected to be rare in the sample, their weights would be low in samples where  
163 they are noise, and high in samples where they are signal.

### 164 Standardization

165 While empirical *RQE* is calculated as described above, it must be standardized in order to compare  
166 effect size between different variables and different species, because the metric’s scale is dependent on the  
167 scales of *D* and *p*. Phylogenetic specificity approaches have previously used a standardized effect size (SES)  
168 approach [2], but we found that SES has unfortunate properties when used with our generalized approach  
169 to specificity. Critically, SES was highly sensitive to occupancy, which is the number of samples a species  
170 occupies. One would expect the strength of specificity to be lower when a species occupies more samples,  
171 because this means the species must occur in a broader range of habitat. However, SES counter-productively  
172 yields stronger specificity for more occupant species, and also for species with more even distributions. This  
173 is because SES is standardized using a distribution of values generated with permuted species weights. If  
174 all weights are similar (high evenness), the standard deviation of that distribution will be small, leading to  
175 a strong SES. SES is also undesirable because for a given species, it is tightly associated with that species’  
176 *P*-value (the probability of SES being as strong or stronger, despite the null hypothesis being true), enough  
177 so that a suggested remedy for yet other problems with SES is to use a probit transformed *P*-value in its  
178 place [15].

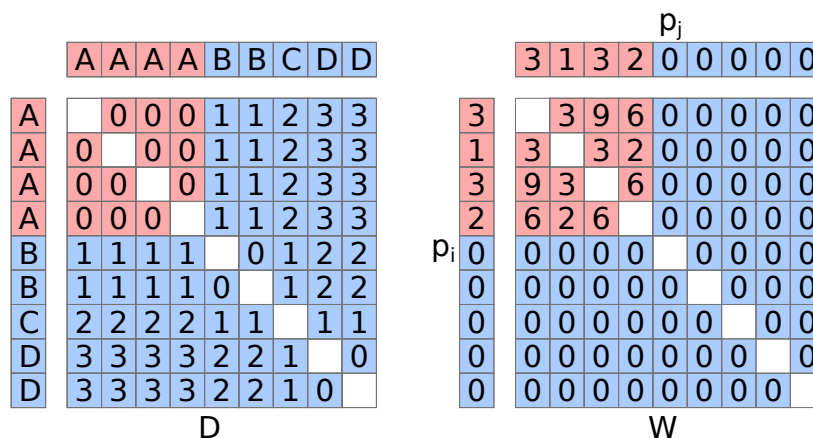

Figure 1: *RQE* as it applies to specificity. In this example, two matrices are shown, *D* and *W*. *D* is an environmental dissimilarity matrix, describing how different are several environment types, A through D, with multiple samples represented for each environment type. Note that diagonals are empty because they are not used; see Equation 1. Matrix *W* is the pairwise product of species weights *p* (Equation 1). In this example, the focal species is perfectly specific to habitat A, which can be seen in *p*. Data corresponding to species detections are colored in red, and species absences in blue. The product  $D \circ W (=D_{ij}p_i p_j)$  will be all zeroes for this example, because this example shows perfect specificity. Thus, the sum of that product, *RQE*, will be zero. If *p* had relatively small values instead of its zeroes, for example 0.25, those small values would still down-weight their corresponding larger differences in *D* and produce a signal of specificity, compared to random permutations of *p* which produce much higher *RQE* values.

179 We standardize *RQE* by leveraging the fact that for perfect specificity, empirical *RQE* ( $RQE_{emp}$ , Figure  
 180 1) equals zero. Our statistic, which we simply call *Spec*, ranges from -1 to 1, with 0 as the null hypothesis  
 181 that species weights are randomly ordered with regard to sample identity. Similar to SES,  $RQE_{sim}$  is a  
 182 vector of *RQE* values calculated using random permutations of *p*. The distribution of  $RQE_{sim}$  is used for  
 183 calculating P-values, and its central tendency is defined as  $Spec = 0$ . This central tendency can be calculated  
 184 several ways using our software, but the default is to use the mean of  $RQE_{sim}$  since in our testing, mean and  
 185 median showed highly concordant *Spec* results (Supplementary Figure S1). The equation for *Spec* (Equation  
 186 2) is a piecewise function, with the two parts corresponding to specificity and generality, respectively. In the  
 187 case of specificity, *Spec* simply scales  $RQE_{emp}$  relative to the center of  $RQE_{sim}$  such that perfect specificity  
 188 returns -1, and the null hypothesis returns 0. In this case, “null hypothesis” refers to  $RQE_{emp}$  being the  
 189 expected value of  $RQE_{sim}$ .

$$Spec = \begin{cases} RQE_{emp} \leq \overline{RQE_{sim}}, & \frac{RQE_{emp} - \overline{RQE_{sim}}}{\overline{RQE_{sim}}} \\ RQE_{emp} > \overline{RQE_{sim}}, & \frac{RQE_{emp} - \overline{RQE_{sim}}}{RQE_{max} - \overline{RQE_{sim}}} \end{cases} \quad (2)$$

190 The case of generality is slightly more complicated, since there is no intuitive maximum theoretical *RQE* value.  
 191 Generality in this context refers to species that encounter greater environmental heterogeneity than expected  
 192 by chance. We find that maximum value computationally, and standardize *Spec* as a proportion of that value  
 193 (see Equation 2). For each *p* there exists an optimized permutation that yields the highest possible *RQE* value,  
 194  $RQE_{max}$ . We use a genetic algorithm (GA) with Population Based Incremental Learning [16] to search per-  
 195 mutations of *p* that create  $RQE_{max}$ . Our GA begins with a population of surrogate vectors initialized via  
 196 random permutations of *p* (default 150), and random swaps of *p* (a swap being the pairwise substitution of  
 197 two values within the vector; default 150), and also *p* itself. Each generation, the GA calculates *RQE* for each  
 198 vector in the population, then keeps some of the vectors with the highest *RQE* value (default 5). The next  
 199 generation is composed of those kept vectors, and random swaps thereof until the total original population  
 200 size is met (default 301). Our swapping algorithm can also use a stochastic number of swaps per vector per



201 generation (including initialization), drawn at random from a user-defined set (default 1,1,2,3). In addition  
202 to swapping, mutation can be performed by crossover via the PMX algorithm [17], which is used because it  
203 incorporates both order and position of both parents, which is required for this problem. However, in our  
204 testing we found that crossover did not improve GA efficiency, so the default operation is not to perform  
205 PMX. The GA runs for a fixed number of generations (default 400), or until a number of generations have  
206 passed with no improvement (default 10). These parameters were chosen because they performed well on the  
207 data sets we analyze here, meaning that species reached the early termination condition.

208 Our GA is relatively computationally intensive, consuming the majority of computational time for a given  
209 specificity analysis even though it is only used for a minority of species. This is unlikely to be a concern  
210 on smaller data sets (*i.e.* a few hundred samples), but since many users may not be interested in “general”  
211 species, another option is to scale *Spec* for all species using the top half of Equation 2 instead. This is  
212 considerably faster, and the user can either discard “general” species as uninteresting, or choose to interpret  
213  $Spec > 0$  within an ordinal framework (a brief analysis showed the results of this approach and those of the  
214 GA are strongly correlated; Supplementary Figure S2).

## 215 Hypothesis testing

216 For the *Spec* calculation above, a *P*-value may be calculated as the proportion of  $RQE_{sim}$  values that  
217 are lower than  $RQE_{emp}$ . The default operation of our software is to adjust *P*-values calculated for different  
218 species from the same variable for multiple hypothesis testing by applying the Benjamini-Hochberg procedure  
219 [18].

## 220 Features of *Spec*

221 *Spec* captures signal of specificity to simulated vector, matrix, and phylogenetic data (Supplementary  
222 Figures S3, S4). It is insensitive to species occupancy (Supplementary Figures S5, S6) and is insensitive to the  
223 number of samples within a data set (Supplementary Figure S7). *Spec* is also scale-invariant, independently  
224 in regard to *p* and *D* inputs (Supplementary Figure S8). It is sensitive to multimodality, and multimodal  
225 species distributions are still detected as exhibiting significant specificity by *Spec* (Supplementary Figure S9).

## 226 Validation analyses

227 Species were simulated with varying levels of specificity by drawing from a normal distribution centered  
228 on an artificial “optimum” environmental location (*e.g.* elevation of 300 meters). Varying specificities were  
229 achieved by widening the standard deviation of that distribution, or by mixing the normal distribution with  
230 varying proportions of a uniform distribution. Multimodal specificity was simulated similarly by combining  
231 multiple distributions. Specificity of simulated species was analyzed using our software. Occupancy of simu-  
232 lated species was increased or decreased by randomly substituting simulated weights with zero, and specificity  
233 was analyzed across an occupancy gradient using that approach. Real data (see Endophyte analysis, below)  
234 were randomly downsampled to test the sensitivity of *Spec* to sample size. Real data were also re-ordered to  
235 create simulated high-specificity species that use empirical distributions of weights, and then those simulated  
236 species were subjected to a swapping algorithm that gradually introduced entropy into the species. The  
237 swapping algorithm swaps values from two randomly selected positions in *p* (Equation 1). This was done  
238 recursively for 1000 generations (2 swaps per generation), saving *p* each time. Our software was then run on  
239 all vectors simulated this way.

## 240 Analysis of endophyte data

241 Data from Hawaiian foliar endophytic fungi [19] were downloaded from FigShare. These are illumina  
242 MiSeq data of the Internal Transcribed Spacer (ITS) region of fungal ribosomal RNA, from 760 samples  
243 collected from the leaves of native Hawaiian plants across five islands in the Hawaiian archipelago. This data  
244 set is also included in our R package. The features under investigation in this analysis were fungal OTUs.  
245 Data were transformed (“closed”) using total sum scaling, and fungal OTUs present in fewer than 10 samples  
246 were excluded from specificity analysis, because low-occupancy data can be unreliable (Supplementary Figure  
247 S6). The remainder (416 OTUs) were run through our software using default settings except run in parallel

248 using 20 CPU cores. Variables used in this analysis were NDVI (an index of vegetation density), elevation,  
249 evapotranspiration, rainfall, host plant phylogeny, and geographic distance between sample sites.

## 250 Analysis of Antarctic bacteria data

251 Data from Antarctic cryoconite hole bacteria [20] were obtained from the authors. Cryoconite holes are  
252 isolated melt pools on the surface of glaciers, caused by debris from nearby slopes falling onto the glacier,  
253 and then melting into its surface. These holes form discrete microbial communities that have been described  
254 as “natural microcosms” [21]. This data set comprises 90 samples across three adjacent glaciers, and features  
255 are bacterial (16S rRNA) and eukaryal (18S rRNA) Amplicon Sequence Variants (ASVs; a type of OTU).  
256 Taxonomy was assigned to 18S rRNA ASVs using dada2 [14], and Bray-Curtis beta-diversity was calculated  
257 for only those ASVs that were determined to be algae. Analyses on 16S rRNA data were run and visualized  
258 as above, with variables N (Nitrogen), P (Phosphorus), pH, geographic distance, fungal Bray-Curtis beta-  
259 diversity (calculated from 18s rDNA data), and algal beta-diversity. Bacterial associations with individual  
260 glaciers (*e.g.* “OTU4 is found predominantly on Canada Glacier”) were computed using Dunn’s test [22],  
261 which is a nonparametric post-hoc test of difference in means.

## 262 Analysis of Human microbiome data

263 Data from Franzosa et al. [23] were downloaded as supplemental data from the online version of the  
264 article. These data contain both gut bacterial and archaeal species composition data as well as corresponding  
265 metabolomic data, collected from 220 adults with Crohn’s disease, ulcerative colitis, or healthy controls.  
266 Data were downloaded in a processed state, after the following procedures had been completed: species  
267 composition data from this study were derived from metagenomic data, which were assigned taxonomy  
268 and grouped into OTUs using MetaPhlan2 [24], and excluded samples that did not meet a 0.1% relative  
269 abundance threshold in at least 5 samples. Metabolite data were measured using positive and negative ion  
270 mode LC/MS, and were reported as parts per million. Metabolite identities were assigned programatically,  
271 and were clustered into broad classes per the Human Metabolome Database [25]. We subset the matrix of  
272 metabolome data by those classes, and used Euclidean distance to calculate the extent to which any two given  
273 samples differed in metabolomic composition within a given class (*e.g.* “how different is the composition of  
274 bile acids between sample A and sample B?”). Metabolite classes were excluded if they were totally absent  
275 in any sample, or if they contained fewer than 10 metabolites, which left 83 classes. specificity was used to  
276 calculate *Spec* for microbial OTUs to each metabolite class distance matrix.

## 277 Analysis of Earth Microbiome Project data

278 Data from the Earth Microbiome Project (EMP)[26] were compiled and downloaded from Qiita [27].  
279 These data comprise a global sampling of 16S rRNA ASVs produced by multiple studies. All of the studies  
280 followed a uniform protocol for collection, processing, and analysis of microbial data. A major component of  
281 the EMP is a rigid sample type ontology. The EMP Ontology (EMPO) was designed to categorically represent  
282 two main drivers of bacterial community composition: host association and salinity, for each sample that was  
283 collected. At the broadest level (EMPO1), samples were categorized as being host-associated or free living.  
284 At the intermediary level (EMPO2), samples were further divided into saline, non-saline, animal, plant, and  
285 fungus. The finest level (EMPO3) separated samples into 22 discrete substrate types (*e.g.* water (saline),  
286 plant corpus, animal distal gut).

287 Because this data set is so large (28,842 samples and 309,469 ASVs), ASVs were excluded that were not  
288 present within at least 30 samples, samples were discarded if they had fewer than 5,000 reads, and samples  
289 without ontological data were discarded (leaving 25,188 samples and 7,014 ASVs). ASVs were excluded due  
290 to low occupancy to avoid spurious ASVs and to avoid low-abundance ASVs that do not perform well with  
291 *Spec*, and more importantly to keep computation size manageable for this massive data set. Samples were  
292 also discarded mainly due to computational concerns, with low-count samples being dropped first due to  
293 lower confidence in their proportional abundance calculations. The EMP ontology was transformed into a  
294 phylogeny using specificity’s “onto2nwk” function, which makes a cladogram within which all branch-lengths  
295 were set to 1. Specificity analysis was run using the ASV table and the ontological data. Database matches  
296 for individual species of interest were manually obtained using nucleotide BLAST [28] via the NCBI web

portal, using the 16S rRNA sequence database as reference.

298

## 299 Implementation

300 *specificity* was written in the R programming language, with some functions written in C++ using *Rcpp*  
301 [29]. The general format of the package follows standard R package structure [30]. Unit testing was done  
302 using *testthat* [31]. *specificity.shiny* was written entirely in R, and uses the *shiny* [32] interactive web appli-  
303 cation framework. Both packages are free and open source software, licensed under the Gnu Public License  
304 (GPL). Installation is easily done using the “install\_github” function of the R package remotes [33]; see data  
305 availability section for details.

## 306 Results and discussion

### 307 Hawaiian endophyte specificity analysis

308 We found that foliar endophytic fungi (FEF) from within the leaves of native Hawaiian plants exhibited  
309 strong and statistically significant specificity to several environmental variables (Figure 2), including variables  
310 that were only weakly associated with FEF community composition [19]. For example, in the original paper,  
311 rainfall and elevation were relatively weak predictors of FEF phylogenetic beta-diversity, but many FEF  
312 species show strong specificity to those variables in the analysis presented here. This reflects a fundamental  
313 difference between community-centric approaches (*e.g.* FEF community composition) vs. species-centric  
314 approaches like (*e.g.* specificity analysis). The signal of individual species is lost when a community is aggre-  
315 gated into a beta-diversity matrix or similar, and consequentially individual species within the community  
316 may even respond to environmental variables orthogonally to the community as a whole. Species that were  
317 strongly specific to rainfall or elevation are examples of this.

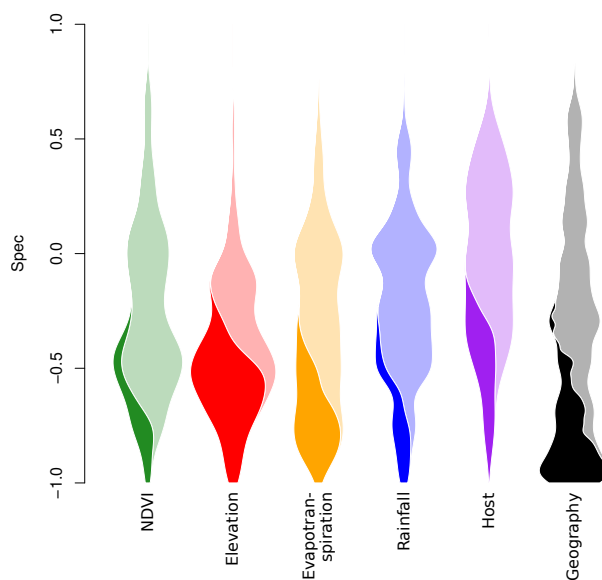

Figure 2: Specificity of Hawaiian Foliar Endophytic Fungi. In this plot, the *Spec* values for 416 fungal species are plotted as violins for different variables. Since the number of species is the same for each variable, each violin has the same total area. Violin area is divided between species with statistically significant specificity (dark) vs. species without (light).

318 We found that many FEF species have strong and statistically significant specificity to geographic location,



319 which makes sense given the discrete spatial structure of the Hawaiian islands [34], and that these FEF  
320 communities only are spatially structured up to distances of 36 kilometers [19]. But geographic specificity  
321 may be an artifact of specificity to other variables with strong geographic autocorrelation. For example, in  
322 Hawaii (and elsewhere), rainfall is a spatially structured phenomenon [35], with nearby areas experiencing  
323 dramatically different rainfall averages as a consequence of aspect and elevation. Thus, species that have  
324 strong specificity to rainfall likely also have strong specificity to geography, which is true in our analysis.  
325 Indeed, the same is true for elevation, albeit to a lesser extent Figure 2.

326 One of the fungi with strongest specificity in our analysis was of the genus *Harknesia*, with closest BLAST  
327 match in the NCBI nucleotide database to *H. platyphyllae*, a eucalyptus pathogen. In our data set, this fungus  
328 was found on multiple hosts, including *Metrosideros polymorpha*, which is in the same family as eucalyptus  
329 (*Myrtaceae*). This *Harknesia* was found exclusively within the interior of Hawaii island, at elevations between  
330 1700 and 2000 meters above sea level. Likely because of its strong geographic and elevational specificity, it  
331 also exhibited strong specificity to evapotranspiration, only being found in areas with 40 to 50 mm per year.  
332 Other fungi, such as an ASV most closely related to *Phaesosphaeria papayae*, exhibited strong specificity to  
333 elevation, evapotranspiration, and vegetation (NDVI), but were found on multiple islands across the Hawaiian  
334 archipelago. Thus, while geographic specificity can appear as specificity to geographically autocorrelated  
335 variables, this is not always the case.

336 Notable generalists ( $Spec > 0$ ) in the endophyte dataset include the genus *Colletotrichum*, a globally  
337 distributed genus of plant pathogenic and endophytic fungi. Almost all agricultural crops are impacted by  
338 members of *Colletotrichum* and it is considered a ‘top ten’ fungal pathogen for molecular plant pathological  
339 research [36]. Of the 9 ASVs identified as *Colletotrichum*, none showed specialization to plant host or  
340 geography. Recently, genomic studies of this genus have provided insight into the genetic mechanisms behind  
341 host generalism and the activation of latent pathogenicity [37; 38]. Low specificity to geography and host  
342 within this dataset indicates that asymptomatic *Colletotrichum* species are widespread within the native  
343 Hawaiian flora.

## 344 **Antarctic glacier bacteria specificity analysis**

345 Similar to the FEF analysis above, bacteria living in cryoconite holes (isolated melt pools) on glaciers in  
346 Antarctica’s Taylor Valley [20; 21] exhibited strongest specificity to geographic distance (Figure 3). This data  
347 set spanned three glaciers: Canada, Taylor, and Commonwealth, with equal sampling on each, but geographic  
348 distance accounts for distances within glaciers as well. The strong geographic specificity observed here reflects  
349 bacteria that are differentially abundant among glaciers, for example occupying only one or two of the three.  
350 The three glaciers, each flowing into a separate lake basin, are spaced along the 40-km length of the Taylor  
351 Valley, which stretches from the polar ice sheet to the coast. The cryoconite holes from the most inland glacier,  
352 Taylor Glacier, have fewer nutrients than those nearer the coast, on Commonwealth Glacier [39]. The more  
353 inland cryoconite holes also have the lowest diversity of bacteria, while the holes nearest the coast support the  
354 most diverse bacterial communities [21]. Many bacterial species may therefore be specific to Commonwealth  
355 Glacier because it supports more species within its cryoconite holes than the other two glaciers. Besides  
356 the differences in bacterial richness among the glaciers, the composition of the bacterial community turns  
357 over among glaciers, with different sequence variants dominating each glacier [20]. Biogeochemical differences  
358 within cryoconite holes among glaciers furthermore correspond with biogeochemical gradients along the valley  
359 in the surrounding soils [39]. The difference in dominant bacterial taxa on each glacier may primarily reflect  
360 (1) differences in which bacteria dominate the soils surrounding each glacier and therefore disperse onto  
361 each glacier, (2) a response to biogeochemical conditions within cryoconite holes on the glacier, or (3) an  
362 interaction of the two. Experimental microcosms manipulating dispersal and nutrient availability could help  
363 to parse out dominant controls on geographic specificity of bacteria in the future.

364 Strong bacterial specificity to co-occurring algal communities was expected, given the strong correlation  
365 between bacterial and eukaryal diversity previously observed in this supraglacial system [20] and elsewhere  
366 [40]. In our analysis, we found that specificity to algae was strongly negatively correlated with specificity  
367 to phosphorus ( $r = -0.69$ ); even though those two variables were not strongly correlated with each other  
368 ( $r_M = -0.05$ ). In other words, bacteria that are specific to algal community composition are not specific  
369 to sediment phosphorus concentration, and vice-versa. Using post-hoc tests, we found that bacteria with  
370 strong specificity to phosphorus concentration were predominantly associated with Taylor Glacier (but not

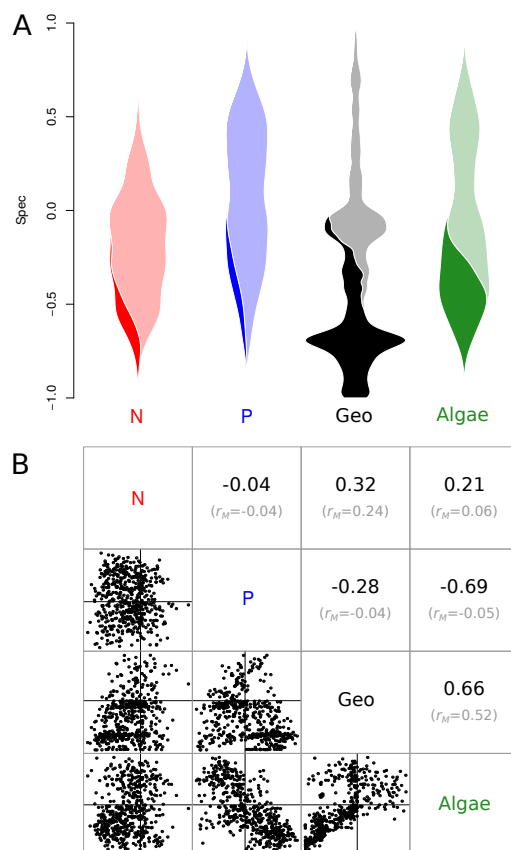

Figure 3: Specificity of Antarctic cryoconite hole bacteria. **A**: Violin plot of specificity to sediment nitrogen concentration (N, red), sediment phosphorus concentration (P, blue), geographic distance (Geo, black), and algal community composition (Algae, green). Violins are scaled and shaded identically to those in Figure 2. **B**: Pairwise *Spec* correlations. Correlation coefficients ( $r$ ) for each pairwise comparison are shown in this subplot’s upper triangle, with mantel correlation coefficients ( $r_M$ ) shown below in gray. Mantel correlations describe the relationship between the variables themselves, *e.g.* “is algal community dissimilarity correlated with geographic distance”. The *Spec* correlations shown above in black are the correlation values for the data plotted in the lower triangle of this subplot.

371 exclusively), and that bacteria with strong specificity to algal community composition were predominantly  
 372 found on Commonwealth Glacier.

373 Similarly, the correlation in *Spec* between geographic distance and algae (Figure 3B) highlights a feature  
 374 of specificity analysis using *Spec*: when comparing specificity of the same features to two different variables,  
 375 *Spec* is likely to be strongly correlated when the variables have a linear relationship. That linear relationship  
 376 can be seen in the Mantel correlation between pairwise geographic distance and algal beta-diversity ( $r_M=0.52$ ;  
 377 Figure 3B). But with variables that are weakly correlated, *Spec* may or may not be correlated between the  
 378 variables. For example, difference in phosphorus concentration is not correlated with algal beta-diversity, but  
 379 bacterial specificity to those variables is correlated (Figure 3B).

### 380 Human gut microbiome metabolomic composition specificity

381 In this analysis, we asked whether bacteria and archaea in the human gut microbiome had specificity to  
 382 paired metabolomic data. We computed bacterial specificity to compositional dissimilarity of 83 different  
 383 metabolomic classes, and of those 83, microbes showed statistically significant specificity to only 25 (Figure  
 384 4). The interpretation of this analysis is similar to that of the specificity to algal community composition

385 above. Specificity to a certain composition of paired data is a more abstract concept than specificity to  
 386 elevation or even to the EMP ontology, but this type of specificity makes intuitive ecological sense in the  
 387 context of species-habitat association. Different microbes have different environmental needs, both within  
 388 the human gut microbiome [41] and elsewhere [42]. As such, those microbes can be expected to be found  
 389 in environments that meet those needs. Similarly, microbes in the human gut influence their environment  
 390 [43], and as such can be expected to be found in environments that are changed by their presence. Since  
 391 different microbes interact with different sorts of metabolites, differential specificity to metabolite classes is  
 392 an expected outcome.

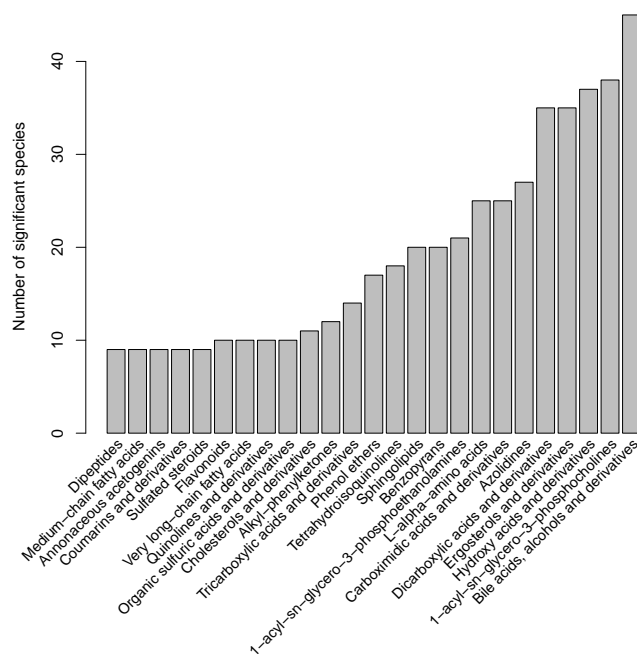

Figure 4: Count of bacterial and archaeal species that exhibited significant specificity to metabolomic composition in human gut microbiome data. Each bar represents the number of species (out of 201 total) that showed significant specificity to the composition of a given metabolomic class. Ordering of metabolomic classes on the horizontal axis is arbitrary.

393 We found that more microbial species had significant specificity to the composition of bile acids, alcohols,  
 394 and derivatives, compared to other metabolomic classes (Figure 4). This result is not surprising, since bile  
 395 acids strongly interact with the gut microbiome, and are also created and manipulated by it [44]. Furthermore,  
 396 the experimental design for these data contained subjects with Crohn’s disease, with ulcerative colitis, and  
 397 healthy controls; and bile acids play a significant role in both Crohn’s disease and ulcerative colitis [45].  
 398 Microbes in this analysis could be specific to either of those two conditions and their plausibly co-occurring  
 399 bile acids, alcohols, and derivatives, or to subclasses thereof. Composition of this metabolomic class did not  
 400 strongly correlate with composition of other metabolomic classes; its highest Mantel correlation was with  
 401 Benzopyrans ( $r_M = 0.46$ ).

402 Species with the strongest specificity to bile acids *etc.* were *Bacteroides plebeius*, an unclassified *Methanobrevibacter*  
 403 *species*, *Odoribacter laneus*, *Methanosphaera stadtmanae*, and *Ruminococcus callidus* (all  $Spec < -0.60$ ), although many other species showed significant specificity to this metabolomic class as well. *B. plebeius* was initially isolated on bile media [46], and was found to be associated with primary bile acids (as opposed to secondary bile acids) in patients with pediatric Crohn’s disease [47]. *Methanobrevibacter sp.* (likely *M. smithii*) and *Methanosphaera stadtmanae* (both Archaea) are the predominant methanogens found in the human gut [48]. *M. smithii* is known to grow in the presence of bile salts [49], and may be a biomarker against inflammatory bowel disease (IBD) or for its remission [50]. The metabolomic class with the second most specific microbes was 1-acyl-sn-glycero-3-phosphocholines (also called 2-lysolecithins). These

411 compounds are derivatives of phosphatidylcholine, which is used as a treatment for ulcerative colitis, but is  
412 also found naturally in some foods [51]. This finding is different than showing some bacterial species' relative  
413 abundances correspond to the amount of phosphatidylcholine derivatives; instead this analysis focuses on the  
414 composition of phosphatidylcholine derivatives; albeit with the amount of those compounds as a component  
415 since Euclidean distance was used.

416 In our analysis, we asked which metabolomic classes had the most microbial species specific to them  
417 (Figure 4). The results of this type of analysis are intended to mirror common beta-diversity analyses used in  
418 microbial ecology, which ask to what extent variables explain differences in microbiome community structure  
419 [19; 20; 52]. However, more complex questions can be asked of these data, using the results of specificity as  
420 a starting point for feature set reduction or variable selection. For example, given an individual bacterial  
421 species of interest, the variables to which it is specific may be used in a random forests model to predict its  
422 presence. For the purpose of variable selection, specificity has very low computational resource requirements  
423 when used with only the top half of Equation 2 (using option `denom_type="sim_center"`), and can be run on  
424 personal computer hardware. This mode produces the same  $P$ -values as the more comprehensive mode, and  
425 produces the same  $Spec$  values for any species with  $Spec < 0$ . In addition to variable selection, specificity  
426 has application in detecting species that may be common lab contaminants, as shown in our EMP analysis  
427 below.

## 428 Earth Microbiome Project (EMP) ontological specificity

429 As expected, the vast majority (6,909/7,014) of bacterial ASVs we analyzed within the EMP data set  
430 exhibited significant and strong specificity to the EMP ontology (Figure 5). Given the distinct community-  
431 level differences in microbiomes across this ontology [26], it is not a surprise that most microbial species  
432 exhibit the same pattern. Instead, the species that buck this trend are of interest as potential cosmopolitan  
433 taxa, or possible bioinformatic failures. The sequence data obtained from the EMP data set are only 91  
434 base-pairs in length, and even though they were clustered as exact sequence variants [14], it is possible that  
435 environmentally divergent ecotypes [53] were clustered together into the same ASV in this way.

436 One such highly distributed ASV was found in almost all EMP ontology categories except for saline, hy-  
437 persaline, and non-saline water ( $Spec = -0.13$ ,  $P = 0.35$ ). It was 100% identical to multiple *Actinomadura*  
438 species, including *A. algeriensis* from Saharan soil [54], the human pathogen *A. madurae* [55], the root endo-  
439 phyte *A. syzygii* [56], *A. maheshkhaliensis* from mangrove rhizosphere soil [57], and *A. apis* from honeybees  
440 [58], and others. These environment types span the EMP ontology, suggesting that the highly distributed  
441 ASV in question is a spurious combination of multiple *Actinomadura* ecotypes, each of which would likely  
442 have a strong specificity signal if analyzed independently. A counterexample is a strongly specific ASV,  
443 found exclusively in animal distal guts. It was 100% identical to multiple species as well, although each  
444 was originally isolated from similar environments: *Oxobacter pfennigii* (cattle rumen [59]), *Proteiniclasticum*  
445 *ruminis* (yak rumen [60]), and *Lutispora thermophila* (solid waste bioreactor [61]). These examples illustrate  
446 that like with every analysis, results can only be as good as input data. Users with very short-read marker  
447 gene data are likely already aware of this limitation, so we will not belabor the point.

## 448 Interactive data visualization

449 In addition to using our *specificity* R package to calculate  $Spec$  and produce the figures shown above,  
450 we also used its companion package, *specificity.shiny*, to explore data and identify interesting features (Sup-  
451 plementary Figure S10). With this tool, users can easily create interactive visualizations from specificity  
452 analyses, and share them over the internet. *specificity.shiny* was used in the preparation of this manuscript,  
453 to share results between authors.

## 454 Conclusion

455 Our R package, *specificity*, enables specificity analysis of microbiome data in the context of multiple  
456 variable types. Here, we've shown examples of specificity to geographic variables like elevation and rainfall  
457 (Figure 2), host phylogenetic specificity (Figure 2), specificity to co-occurring microbial community structure  
458 (Figure 3) and metabolomic structure (Figure 4), and specificity to sample type ontology (Figure 5). Our

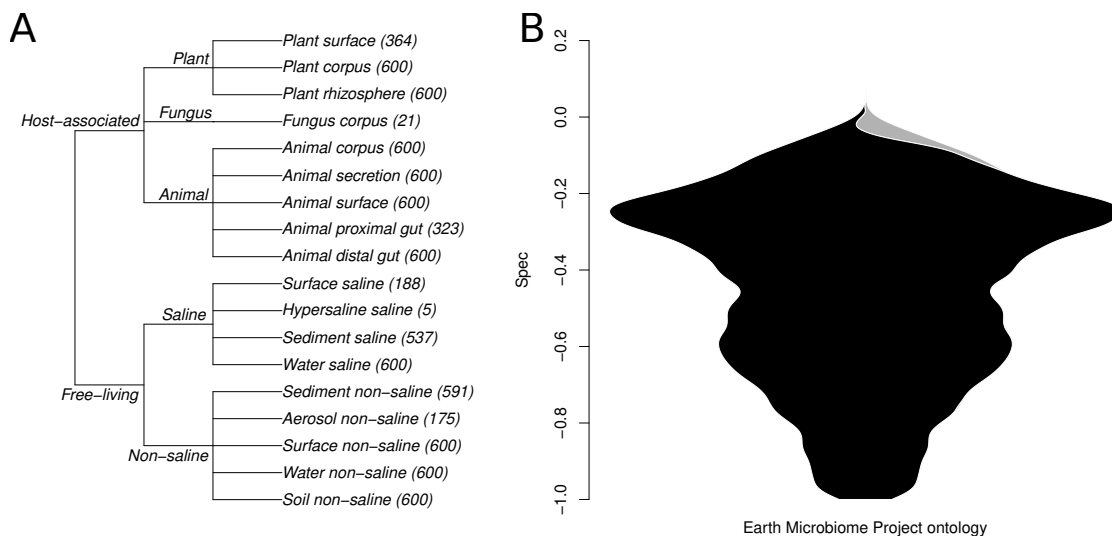

Figure 5: **A**: EMP sample type ontology visualized as a cladogram. **B**: Distribution of *Spec* values for ontological specificity of bacteria and archaea in the EMP data set. Within the cladogram, all branch-lengths are set to 1 for calculation of a cophenetic distance matrix, which is used as  $D$  when calculating *Spec* (Equations 1 and 2). Numbers in parentheses are sample counts. An overwhelming majority of microbes within the EMP data set showed statistically significant specificity to sample type ontology (black), which was expected given the previously reported strong signal in clustering of community composition by sample type [26]. Very few microbes did not show significant specificity (gray).

459 validation analyses show that our statistic, *Spec*, performs intuitively and is sensitive to specificity in both  
 460 empirical and simulated data (Figures S3-S9). Our companion package, *specificity.shiny*, can be used to  
 461 explore results and collaborate on specificity analyses (Figure S10), which was done by the authors on the  
 462 four example analyses we presented here. Both *specificity* and *specificity.shiny* are available from the authors'  
 463 GitHub repository, along with installation instructions and a tutorial vignette.

## 464 References

- 465 [1] Combes C. Parasitism : the ecology and evolution of intimate interactions ; translated by Isaure de  
 466 Buron and Vincent A. Connors ; with a new foreword by Daniel Simberloff; 2001. Publication Title:  
 467 Interspecific interactions.
- 468 [2] Poulin R, Krasnov BR, Mouillot D. Host specificity in phylogenetic and geographic space. 2011;ISSN:  
 469 14714922 Publication Title: Trends in Parasitology.
- 470 [3] Shefferson RP, Bunch W, Cowden CC, Lee YI, Kartzinel TR, Yukawa T, et al. Does evolutionary history  
 471 determine specificity in broad ecological interactions? Journal of Ecology. 2019;.
- 472 [4] Oxford English Dictionary. Oxford English Dictionary Online; 2017. ISBN: 15424715 ISSN: 15424715  
 473 Publication Title: Oxford English Dictionary.
- 474 [5] Bascompte J. Mutualistic networks. vol. 7. Wiley Online Library; 2009.
- 475 [6] Carsten F Dormann wacFM Jochen Freund and Bernd Gruber, Devoto RS Jose Iriondo, Vazquez D.  
 476 Package 'barpartite'. online PDF. 2017;Available from: [https://cran.r-project.org/web/packages/  
 477 bipartite/bipartite.pdf](https://cran.r-project.org/web/packages/bipartite/bipartite.pdf).

- 478 [7] Zhang X, Yi N. NBZIMM: negative binomial and zero-inflated mixed models, with application to  
479 microbiome/metagenomics data analysis. *BMC Bioinformatics*. 2020;.
- 480 [8] Faith DP. Conservation evaluation and phylogenetic diversity. *Biological Conservation*. 1992 Jan;61(1):1–  
481 10. Available from: <http://www.sciencedirect.com/science/article/pii/0006320792912013>.
- 482 [9] Allen B, Kon M, Bar-Yam Y. A new phylogenetic diversity measure generalizing the shannon index and  
483 its application to phyllostomid bats. *American Naturalist*. 2009;.
- 484 [10] Costello MJ. Parasite Rates of Discovery, Global Species Richness and Host Specificity. In: *Integrative  
485 and Comparative Biology*; 2016. ISSN: 15577023.
- 486 [11] Rao CR. Diversity and dissimilarity coefficients: A unified approach. *Theoretical Population Biology*.  
487 1982;.
- 488 [12] Rao CR. Quadratic entropy and analysis of diversity. *Sankhya A*. 2010;.
- 489 [13] Botta-Dukát Z. Rao’s quadratic entropy as a measure of functional diversity based on multiple traits.  
490 *Journal of Vegetation Science*. 2005;.
- 491 [14] Callahan BJ, McMurdie PJ, Rosen MJ, Han AW, Johnson AJA, Holmes SP. DADA2: High-resolution  
492 sample inference from Illumina amplicon data. *Nature Methods*. 2016;13:581–583.
- 493 [15] Botta-Dukát Z. Cautionary note on calculating standardized effect size (SES) in randomization test.  
494 *Community Ecology*. 2018;.
- 495 [16] Baluja S, Caruana R. Removing the genetics from the standard genetic algorithm. In: *Machine Learning  
496 Proceedings 1995*. Elsevier; 1995. p. 38–46.
- 497 [17] Goldberg DE, Lingle R. Alleles, loci, and the traveling salesman problem. In: *Proceedings of an inter-  
498 national conference on genetic algorithms and their applications*. vol. 154. Carnegie-Mellon University  
499 Pittsburgh, PA; 1985. p. 154–159.
- 500 [18] Benjamini Y, Hochberg Y. Controlling the false discovery rate: a practical and powerful approach to  
501 multiple testing. *Journal of the Royal statistical society: series B (Methodological)*. 1995;57(1):289–300.  
502 Publisher: Wiley Online Library.
- 503 [19] Darcy JL, Swift SOI, Cobian GM, Zahn GL, Perry BA, Amend AS. Fungal communities living within  
504 leaves of native Hawaiian dicots are structured by landscape-scale variables as well as by host plants.  
505 *Molecular Ecology*. 2020;.
- 506 [20] Sommers P, Darcy JL, Porazinska DL, Gendron EMS, Fountain AG, Zamora F, et al. Comparison  
507 of Microbial Communities in the Sediments and Water Columns of Frozen Cryoconite Holes in the  
508 McMurdo Dry Valleys, Antarctica. *Frontiers in Microbiology*. 2019;10:65. Available from: <https://www.frontiersin.org/article/10.3389/fmicb.2019.00065>.
- 510 [21] Sommers P, Porazinska DL, Darcy JL, Zamora F, Fountain AG, Schmidt SK. Experimental cryoconite  
511 holes as mesocosms for studying community ecology. *Polar Biology*. 2019;42(11):1973–1984. Publisher:  
512 Springer.
- 513 [22] Dunn OJ. Multiple comparisons using rank sums. *Technometrics*. 1964;6(3):241–252. Publisher: Taylor  
514 & Francis.
- 515 [23] Franzosa EA, Sirota-Madi A, Avila-Pacheco J, Fornelos N, Haiser HJ, Reinker S, et al. Gut microbiome  
516 structure and metabolic activity in inflammatory bowel disease. *Nature microbiology*. 2019;4(2):293–305.  
517 Publisher: Nature Publishing Group.
- 518 [24] Truong DT, Franzosa EA, Tickle TL, Scholz M, Weingart G, Pasolli E, et al. MetaPhlan2 for enhanced  
519 metagenomic taxonomic profiling. *Nature methods*. 2015;12(10):902–903. Publisher: Nature Publishing  
520 Group.



- 521 [25] Wishart DS, Feunang YD, Marcu A, Guo AC, Liang K, Vázquez-Fresno R, et al. HMDB 4.0: the  
522 human metabolome database for 2018. *Nucleic acids research*. 2018;46(D1):D608–D617. Publisher:  
523 Oxford University Press.
- 524 [26] Thompson LR, Sanders JG, McDonald D, Amir A, Ladau J, Locey KJ, et al. A communal catalogue  
525 reveals Earth’s multiscale microbial diversity. *Nature*. 2017;551(7681):457–463. Publisher: Nature Pub-  
526 lishing Group.
- 527 [27] Gonzalez A, Navas-Molina JA, Kosciolk T, McDonald D, Vázquez-Baeza Y, Ackermann G, et al. Qiita:  
528 rapid, web-enabled microbiome meta-analysis. *Nature methods*. 2018;15(10):796–798. Publisher: Nature  
529 Publishing Group.
- 530 [28] Altschul SF, Gish W, Miller W, Myers EW, Lipman DJ. Basic local alignment search tool. *Jour-  
531 nal of molecular biology*. 1990;215(3):403–10. ISBN: 0022-2836 (Print). Available from: [http:  
532 //www.sciencedirect.com/science/article/pii/S0022283605803602](http://www.sciencedirect.com/science/article/pii/S0022283605803602).
- 533 [29] Eddelbuettel D, François R. Rcpp: Seamless R and C++ Integration. *Journal of Statistical Software*.  
534 2011;40(8):1–18.
- 535 [30] Wickham H. *R Packages*. 1st ed. O’Reilly Media, Inc.; 2015.
- 536 [31] Wickham H. testthat: Get Started with Testing. *The R Journal*. 2011;3:5–10. Available from: [https:  
537 //journal.r-project.org/archive/2011-1/RJournal\\_2011-1\\_Wickham.pdf](https://journal.r-project.org/archive/2011-1/RJournal_2011-1_Wickham.pdf).
- 538 [32] Chang W, Cheng J, Allaire J, Sievert C, Schloerke B, Xie Y, et al.. shiny: Web Application Framework  
539 for R; 2021. R package version 1.7.1. Available from: <https://CRAN.R-project.org/package=shiny>.
- 540 [33] Hester J, Csardi G, Wickham H, Chang W, Morgan M, Tenenbaum D. remotes: R Package Installation  
541 from Remote Repositories, Including ‘GitHub’. 2020; Available from: [https://cran.r-project.org/  
542 package=remotes](https://cran.r-project.org/package=remotes).
- 543 [34] Tipton L, Zahn GL, Darcy JL, Amend AS, Hynson NA. Hawaiian Fungal Amplicon Sequence Variants  
544 Reveal Otherwise Hidden Biogeography. *Microbial Ecology*. 2021;p. 1–10. Publisher: Springer.
- 545 [35] Giambelluca TW, Chen Q, Frazier AG, Price JP, Chen YL, Chu PS, et al. Online rainfall atlas of  
546 Hawai ‘i. *Bulletin of the American Meteorological Society*. 2013;94(3):313–316. Publisher: American  
547 Meteorological Society.
- 548 [36] Dean R, Van Kan JA, Pretorius ZA, Hammond-Kosack KE, Di Pietro A, Spanu PD, et al. The Top 10  
549 fungal pathogens in molecular plant pathology. *Molecular plant pathology*. 2012;13(4):414–430. Pub-  
550 lisher: Wiley Online Library.
- 551 [37] Gan P, Ikeda K, Irieda H, Narusaka M, O’Connell RJ, Narusaka Y, et al. Comparative genomic and  
552 transcriptomic analyses reveal the hemibiotrophic stage shift of *Colletotrichum* fungi. *New Phytologist*.  
553 2013;197(4):1236–1249. eprint: <https://onlinelibrary.wiley.com/doi/pdf/10.1111/nph.12085>. Available  
554 from: <https://onlinelibrary.wiley.com/doi/abs/10.1111/nph.12085>.
- 555 [38] Gan P, Narusaka M, Kumakura N, Tsushima A, Takano Y, Narusaka Y, et al. Genus-Wide Compara-  
556 tive Genome Analyses of *Colletotrichum* Species Reveal Specific Gene Family Losses and Gains during  
557 Adaptation to Specific Infection Lifestyles. *Genome Biology and Evolution*. 2016 May;8(5):1467–1481.  
558 Available from: <https://doi.org/10.1093/gbe/evw089>.
- 559 [39] Porazinska DL, Fountain AG, Nylen TH, Tranter M, Virginia RA, Wall DH. The Bio-  
560 diversity and Biogeochemistry of Cryoconite Holes from McMurdo Dry Valley Glaciers,  
561 Antarctica. *Arctic, Antarctic, and Alpine Research*. 2004 Feb;36(1):84–91. Pub-  
562 lisher: Taylor & Francis eprint: [https://www.tandfonline.com/doi/pdf/10.1657/1523-  
563 0430%282004%29036%5B0084%3ATBABC%5D2.0.CO%3B2](https://www.tandfonline.com/doi/pdf/10.1657/1523-0430%282004%29036%5B0084%3ATBABC%5D2.0.CO%3B2). Available from: [https://www.  
564 tandfonline.com/doi/abs/10.1657/1523-0430%282004%29036%5B0084%3ATBABC%5D2.0.CO%3B2](https://www.tandfonline.com/doi/abs/10.1657/1523-0430%282004%29036%5B0084%3ATBABC%5D2.0.CO%3B2).

- 565 [40] Darcy JL, King AJ, Gendron EMS, Schmidt SK. Spatial autocorrelation of microbial communities atop  
566 a debris-covered glacier is evidence of a supraglacial chronosequence. *FEMS microbiology ecology*. 2017;.
- 567 [41] Costello EK, Stagaman K, Dethlefsen L, Bohannan BJ, Relman DA. The application of ecological theory  
568 toward an understanding of the human microbiome. *Science*. 2012;336(6086):1255–1262. Publisher:  
569 American Association for the Advancement of Science.
- 570 [42] Nemergut DR, Schmidt SK, Fukami T, O’Neill SP, Bilinski TM, Stanish LF, et al. Patterns and processes  
571 of microbial community assembly. *Microbiology and Molecular Biology Reviews*. 2013;77(3):342–356.  
572 Publisher: Am Soc Microbiol.
- 573 [43] Kelly CJ, Zheng L, Campbell EL, Saeedi B, Scholz CC, Bayless AJ, et al. Crosstalk between Microbiota-  
574 Derived Short-Chain Fatty Acids and Intestinal Epithelial HIF Augments Tissue Barrier Function. *Cell*  
575 *Host & Microbe*. 2015 May;17(5):662–671.
- 576 [44] Bile Acids and the Gut Microbiome;30. Available from: [https://www.ncbi.nlm.nih.gov/pmc/  
577 articles/PMC4215539/](https://www.ncbi.nlm.nih.gov/pmc/articles/PMC4215539/).
- 578 [45] Tiratterra E, Franco P, Porru E, Katsanos KH, Christodoulou DK, Roda G. Role of bile acids in  
579 inflammatory bowel disease. *Annals of Gastroenterology*. 2018;31(3):266–272. Available from: <https://www.ncbi.nlm.nih.gov/pmc/articles/PMC5924848/>.
- 581 [46] Kitahara M, Sakamoto M, Ike M, Sakata S, Benno Y. *Bacteroides plebeius* sp. nov. and *Bacteroides*  
582 *coprocola* sp. nov., isolated from human faeces. *International Journal of Systematic and Evolutionary*  
583 *Microbiology*. 2005;55(5):2143–2147. Publisher: Microbiology Society,. Available from: [https://www.  
584 microbiologyresearch.org/content/journal/ijsem/10.1099/ijms.0.63788-0](https://www.microbiologyresearch.org/content/journal/ijsem/10.1099/ijms.0.63788-0).
- 585 [47] Connors J, Dunn KA, Allott J, Bandsma R, Rashid M, Otley AR, et al. The relationship between fecal  
586 bile acids and microbiome community structure in pediatric Crohn’s disease. *The ISME Journal*. 2020  
587 Mar;14(3):702–713. Available from: <https://www.nature.com/articles/s41396-019-0560-3>.
- 588 [48] Brown JRM, Flemer B, Joyce SA, Zulquernain A, Sheehan D, Shanahan F, et al. Changes in mi-  
589 crobiota composition, bile and fatty acid metabolism, in successful faecal microbiota transplantation  
590 for *Clostridioides difficile* infection. *BMC Gastroenterology*. 2018 Aug;18(1):131. Available from:  
591 <https://doi.org/10.1186/s12876-018-0860-5>.
- 592 [49] Miller TL, Wolin MJ, de Macario EC, Macario AJ. Isolation of *Methanobrevibacter smithii* from human  
593 feces. *Applied and Environmental Microbiology*. 1982 Jan;43(1):227–232. Publisher: American Society  
594 for Microbiology. Available from: [https://journals.asm.org/doi/abs/10.1128/aem.43.1.227-232.  
595 1982](https://journals.asm.org/doi/abs/10.1128/aem.43.1.227-232.1982).
- 596 [50] Ghavami SB, Rostami E, Sephay AA, Shahrokh S, Balaii H, Aghdaei HA, et al. Alterations of the human  
597 gut *Methanobrevibacter smithii* as a biomarker for inflammatory bowel diseases. *Microbial Pathogene-*  
598 *sis*. 2018 Apr;117:285–289. Available from: [https://www.sciencedirect.com/science/article/pii/  
599 S0882401016304788](https://www.sciencedirect.com/science/article/pii/S0882401016304788).
- 600 [51] Kokkinidis DG, Bosdelekidou EE, Iliopoulou SM, Tassos AG, Texakalidis PT, Economopoulos KP, et al.  
601 Emerging treatments for ulcerative colitis: a systematic review. *Scandinavian journal of gastroenterology*.  
602 2017;52(9):923–931. Publisher: Taylor & Francis.
- 603 [52] Shaw L, Ribeiro ALR, Levine AP, Pontikos N, Balloux F, Segal AW, et al. The Human Salivary  
604 Microbiome Is Shaped by Shared Environment Rather than Genetics: Evidence from a Large Family of  
605 Closely Related Individuals. *mBio*. 2017;8(5):e01237–17. Publisher: American Society for Microbiology.  
606 Available from: <https://journals.asm.org/doi/full/10.1128/mBio.01237-17>.
- 607 [53] Cohan FM. What are bacterial species? *Annual Reviews in Microbiology*. 2002;56(1):457–487. Publisher:  
608 Annual Reviews 4139 El Camino Way, PO Box 10139, Palo Alto, CA 94303-0139, USA.

- 609 [54] Lahoum A, Bouras N, Mathieu F, Schumann P, Spröer C, Klenk HP, et al. *Actinomadura algeriensis* sp.  
610 nov., an actinobacterium isolated from Saharan soil. *Antonie Van Leeuwenhoek*. 2016 Jan;109(1):159–  
611 165.
- 612 [55] Izri A, Aljundi M, Billard-Pomares T, Fofana Y, Marteau A, Ferreira TG, et al. Molecular identification  
613 of *Actinomadura madurae* isolated from a patient originally from Algeria; observations from a case  
614 report. *BMC Infectious Diseases*. 2020 Nov;20(1):829. Available from: [https://doi.org/10.1186/  
615 s12879-020-05552-z](https://doi.org/10.1186/s12879-020-05552-z).
- 616 [56] Rachniyom H, Matsumoto A, Indananda C, Duangmal K, Takahashi Y, Thamchaipenet A. *Actino-*  
617 *madura syzygii* sp. nov., an endophytic actinomycete isolated from the roots of a jambolan plum tree  
618 (*Syzygium cumini* L. Skeels). *International Journal of Systematic and Evolutionary Microbiology*. 2015  
619 Jun;65(Pt 6):1946–1949.
- 620 [57] Ara I, Matsumoto A, Abdul Bakir M, Kudo T, Omura S, Takahashi Y. *Actinomadura maheshkhaliensis*  
621 sp. nov., a novel actinomycete isolated from mangrove rhizosphere soil of Maheshkhali, Bangladesh. *The*  
622 *Journal of General and Applied Microbiology*. 2008 Dec;54(6):335–342.
- 623 [58] Promnuan Y, Kudo T, Ohkuma M, Chantawannakul P. *Actinomadura apis* sp. nov., isolated from a  
624 honey bee (*Apis mellifera*) hive, and the reclassification of *Actinomadura cremea* subsp. *rifamycini* Gauze  
625 et al. 1987 as *Actinomadura rifamycini* (Gauze et al. 1987) sp. nov., comb. nov. *International Journal*  
626 *of Systematic and Evolutionary Microbiology*. 2011 Sep;61(Pt 9):2271–2277.
- 627 [59] Krumholz LR, Bryant MP. *Clostridium pfennigii* sp. nov. Uses Methoxyl Groups of Monobenzenoids  
628 and Produces Butyrate [Journal Article]. *International Journal of Systematic and Evolutionary Mi-*  
629 *crobiology*. 1985;35(4):454–456. Available from: [https://www.microbiologyresearch.org/content/  
630 journal/ijsem/10.1099/00207713-35-4-454](https://www.microbiologyresearch.org/content/journal/ijsem/10.1099/00207713-35-4-454).
- 631 [60] Zhang K, Song L, Dong X. *Proteiniclasticum ruminis* gen. nov., sp. nov., a strictly anaerobic proteolytic  
632 bacterium isolated from yak rumen [Journal Article]. *International Journal of Systematic and Evolution-*  
633 *ary Microbiology*. 2010;60(9):2221–2225. Available from: [https://www.microbiologyresearch.org/  
634 content/journal/ijsem/10.1099/ijms.0.011759-0](https://www.microbiologyresearch.org/content/journal/ijsem/10.1099/ijms.0.011759-0).
- 635 [61] Shiratori H, Ohiwa H, Ikeno H, Ayame S, Kataoka N, Miya A, et al. *Lutispora thermophila* gen. nov.,  
636 sp. nov., a thermophilic, spore-forming bacterium isolated from a thermophilic methanogenic bioreac-  
637 tor digesting municipal solid wastes [Journal Article]. *International Journal of Systematic and Evolu-*  
638 *tionary Microbiology*. 2008;58(4):964–969. Available from: [https://www.microbiologyresearch.org/  
639 content/journal/ijsem/10.1099/ijms.0.65490-0](https://www.microbiologyresearch.org/content/journal/ijsem/10.1099/ijms.0.65490-0).
